# Supplementary material for: Combinatorial therapy regimens targeting preclinical models of melanoma resistant to immune checkpoint blockade
Source: JCI journal article supplement (doi:10.1172/jci185220), 2025-07-10

# Figure 1G

Phospho-p44/42 MAPK (Erk1/2) (Thr202/Tyr204) (E10) Mouse mAb  
(Cell Signaling Technology Cat# 9106, RRID:AB\_331768)

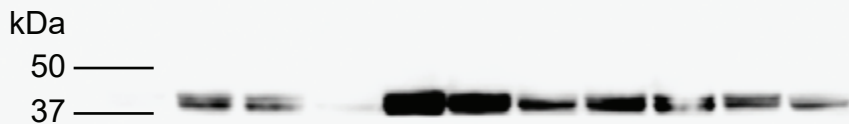

Figure 1G

Phospho-p44/42 MAPK (Erk1/2) (Thr202/Tyr204) (E10) Mouse mAb  
(Cell Signaling Technology Cat# 9106, RRID:AB\_331768)

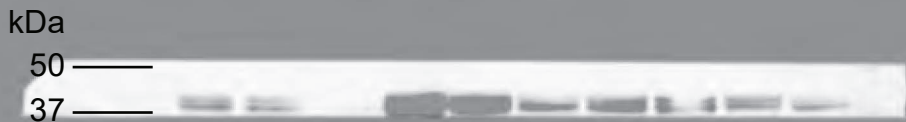

Figure 1G

p44/42 MAPK (Erk1/2) (137F5) Rabbit mAb

(Cell Signaling Technology Cat# 4695, RRID:AB\_390779)

kDa

50 ———

37 ———

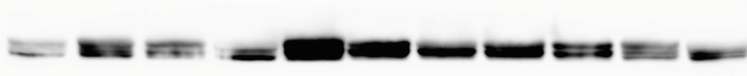

Figure 1G

Bcl-2 (D55G8) Rabbit mAb #4223

(Cell Signaling Technology Cat# 4223, RRID:AB\_1903909)

kDa

37 ———

25 ———

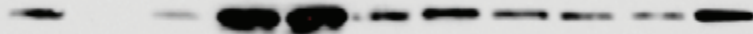

Figure 1G

GAPDH Antibody (G-9)

(Santa Cruz Biotechnology Cat# sc-365062, RRID:AB\_10847862)

kDa

50

37

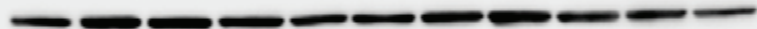

Figure 3D

Phospho-p44/42 MAPK (Erk1/2) (Thr202/Tyr204) (E10) Mouse mAb  
(Cell Signaling Technology Cat# 9106, RRID:AB\_331768)

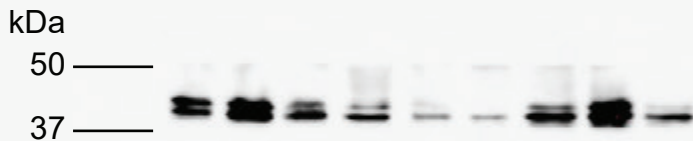

Figure 3D

p44/42 MAPK (Erk1/2) (137F5) Rabbit mAb

(Cell Signaling Technology Cat# 4695, RRID:AB\_390779)

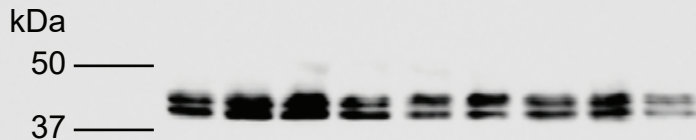

Figure 3D

Phospho-p90RSK (Ser380) (D3H11) Rabbit mAb

(Cell Signaling Technology Cat# 11989, RRID:AB\_2687613)

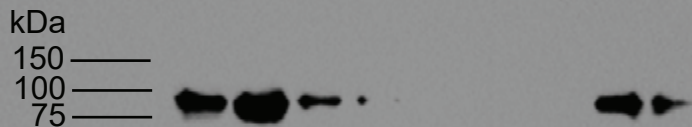

Figure 3D

Phospho-p90RSK (Ser380) (D3H11) Rabbit mAb

(Cell Signaling Technology Cat# 11989, RRID:AB\_2687613)

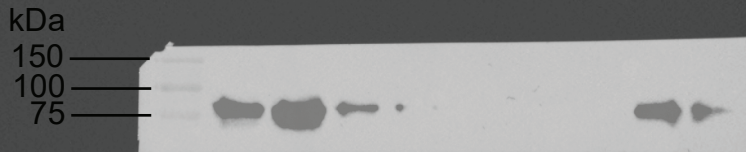

Figure 3D

RSK1 (D6D5) Rabbit mAb

(Cell Signaling Technology Cat# 8408, RRID:AB\_10828594)

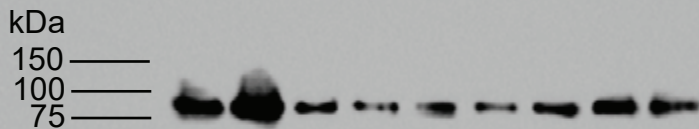

Figure 3D

Phospho-MEK1/2 (Ser217/221) (41G9) Rabbit mAb

(Cell Signaling Technology Cat# 9154, RRID:AB\_2138017)

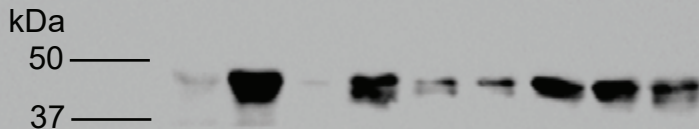

Figure 3D

MEK1/2 (D1A5) Rabbit mAb

(Cell Signaling Technology Cat# 8727, RRID:AB\_10829473)

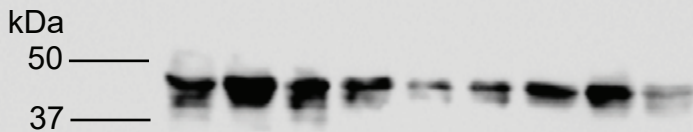

Figure 3D

Bcl-2 (D55G8) Rabbit mAb #4223

(Cell Signaling Technology Cat# 4223, RRID:AB\_1903909)

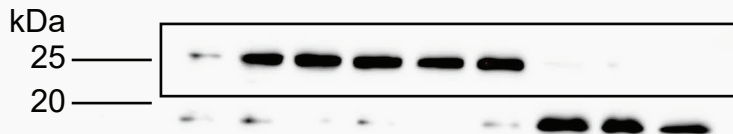

Figure 3D

Bcl-2 (D55G8) Rabbit mAb #4223

(Cell Signaling Technology Cat# 4223, RRID:AB\_1903909)

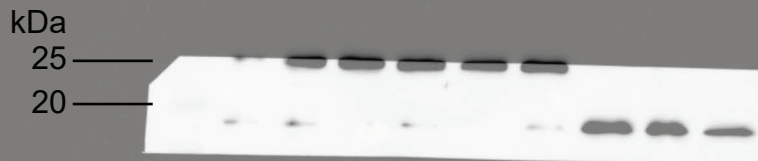

Figure 3D

GAPDH Antibody (G-9)

(Santa Cruz Biotechnology Cat# sc-365062, RRID:AB\_10847862)

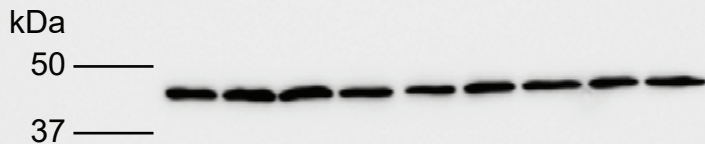

## Figure 3E

Phospho-p44/42 MAPK (Erk1/2) (Thr202/Tyr204) (E10) Mouse mAb  
(Cell Signaling Technology Cat# 9106, RRID:AB\_331768)

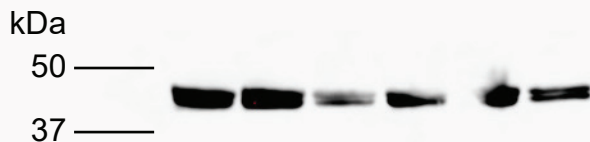

Figure 3E

p44/42 MAPK (Erk1/2) (137F5) Rabbit mAb

(Cell Signaling Technology Cat# 4695, RRID:AB\_390779)

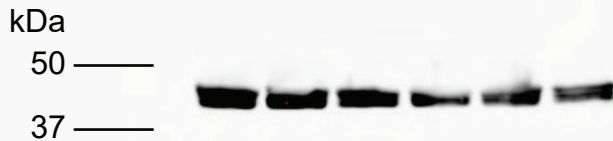

Figure 3E

Phospho-p90RSK (Ser380) (D3H11) Rabbit mAb

(Cell Signaling Technology Cat# 11989, RRID:AB\_2687613)

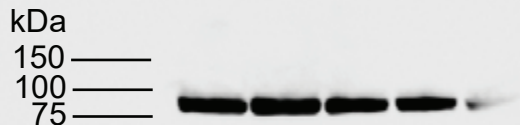

Figure 3E

RSK1 (D6D5) Rabbit mAb

(Cell Signaling Technology Cat# 8408, RRID:AB\_10828594)

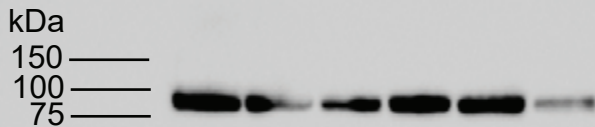

Figure 3E

Phospho-MEK1/2 (Ser217/221) (41G9) Rabbit mAb

(Cell Signaling Technology Cat# 9154, RRID:AB\_2138017)

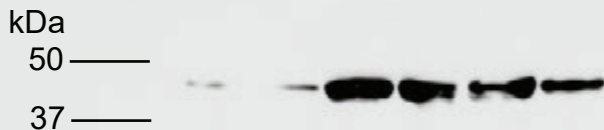

Figure 3E

MEK1/2 (D1A5) Rabbit mAb

(Cell Signaling Technology Cat# 8727, RRID:AB\_10829473)

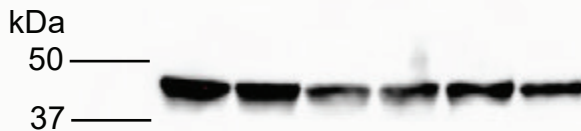

Figure 3E

Bcl-2 (D55G8) Rabbit mAb #4223

(Cell Signaling Technology Cat# 4223, RRID:AB\_1903909)

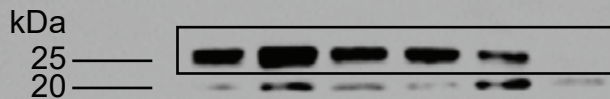

Figure 3E

GAPDH Antibody (G-9)

(Santa Cruz Biotechnology Cat# sc-365062, RRID:AB\_10847862)

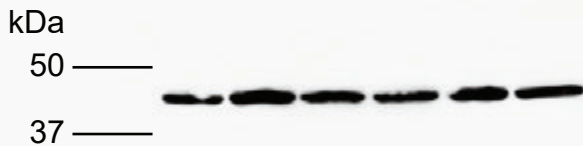

Figure 3F

Phospho-p44/42 MAPK (Erk1/2) (Thr202/Tyr204) (E10) Mouse mAb  
(Cell Signaling Technology Cat# 9106, RRID:AB\_331768)

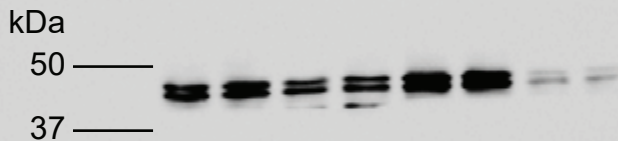

### Figure 3F

p44/42 MAPK (Erk1/2) (137F5) Rabbit mAb

(Cell Signaling Technology Cat# 4695, RRID:AB\_390779)

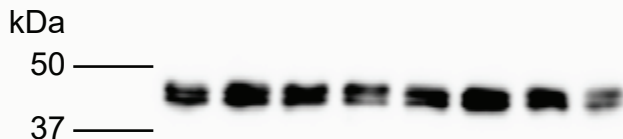

Figure 3F

Phospho-p90RSK (Ser380) (D3H11) Rabbit mAb

(Cell Signaling Technology Cat# 11989, RRID:AB\_2687613)

kDa

100 —  
75 —

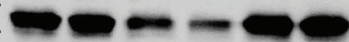

Figure 3F

Phospho-p90RSK (Ser380) (D3H11) Rabbit mAb

(Cell Signaling Technology Cat# 11989, RRID:AB\_2687613)

kDa

100  
75

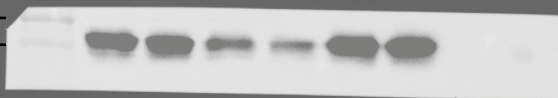

Figure 3F

RSK1 (D6D5) Rabbit mAb

(Cell Signaling Technology Cat# 8408, RRID:AB\_10828594)

kDa

100 —  
75 —

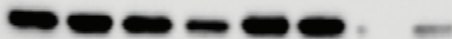

Figure 3F

Phospho-MEK1/2 (Ser217/221) (41G9) Rabbit mAb

(Cell Signaling Technology Cat# 9154, RRID:AB\_2138017)

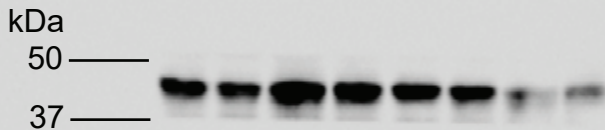

Figure 3F

MEK1/2 (D1A5) Rabbit mAb

(Cell Signaling Technology Cat# 8727, RRID:AB\_10829473)

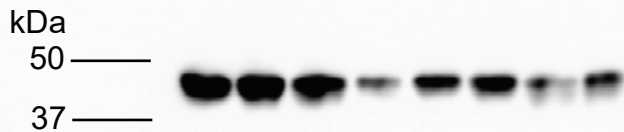

Figure 3F

GAPDH Antibody (G-9)

(Santa Cruz Biotechnology Cat# sc-365062, RRID:AB\_10847862)

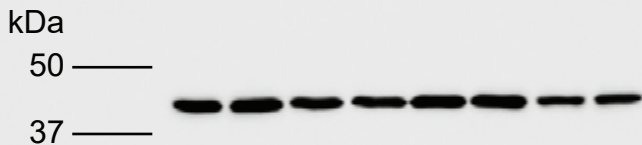

Figure 6D

Rabbit anti-CDK1 Antibody

(Thermo Fisher Scientific Cat# A303-663A, RRID:AB\_11205291)

kDa

250

150

100

75

50

37

25

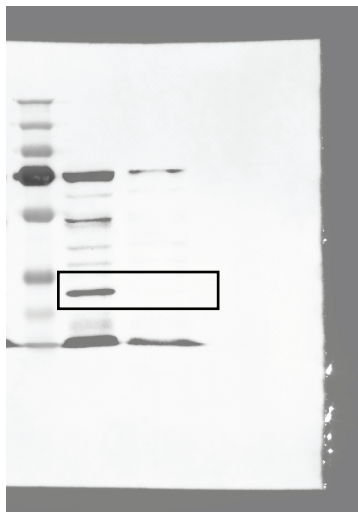

kDa

75 —

50 —

37 —

25 —

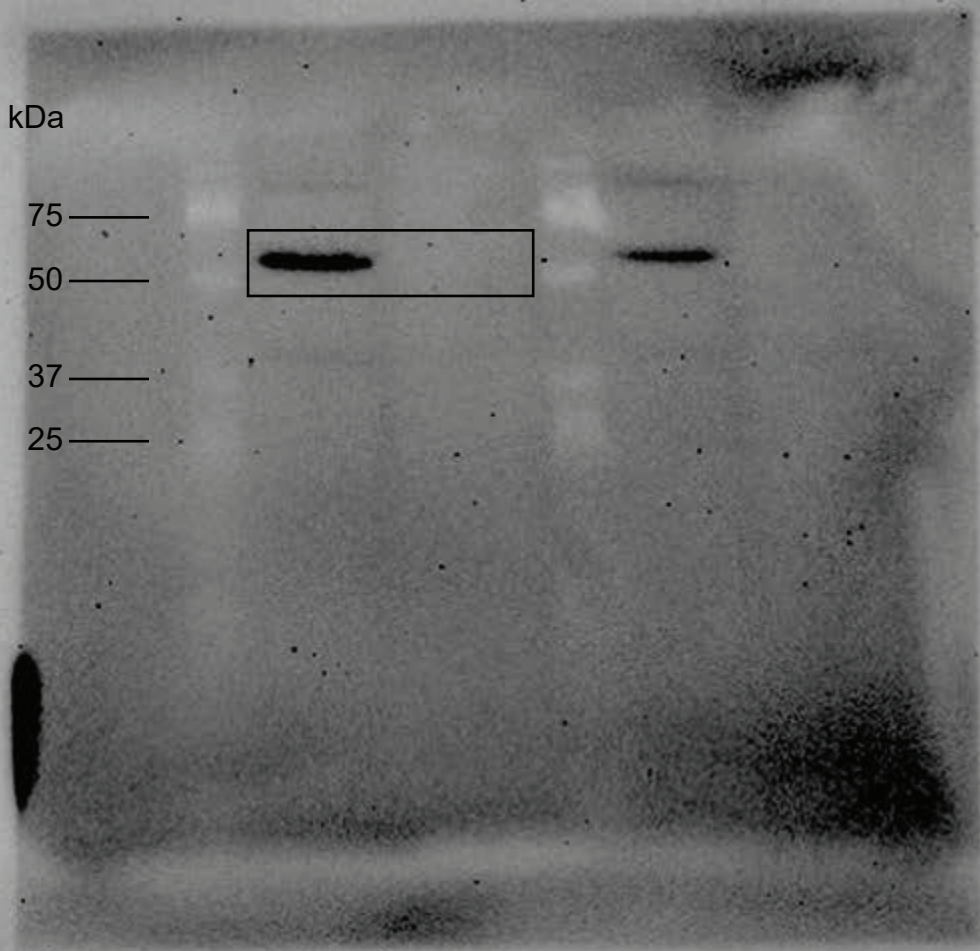

Figure 6D

CCNB1/cyclin B1 Antibody (D-11)

(Santa Cruz Biotechnology Cat# sc-7393, RRID:AB\_627336)

Figure 6D  
cyclin D1 Antibody (A-12)  
(Santa Cruz Biotechnology Cat# sc-8396, RRID:AB\_627344)

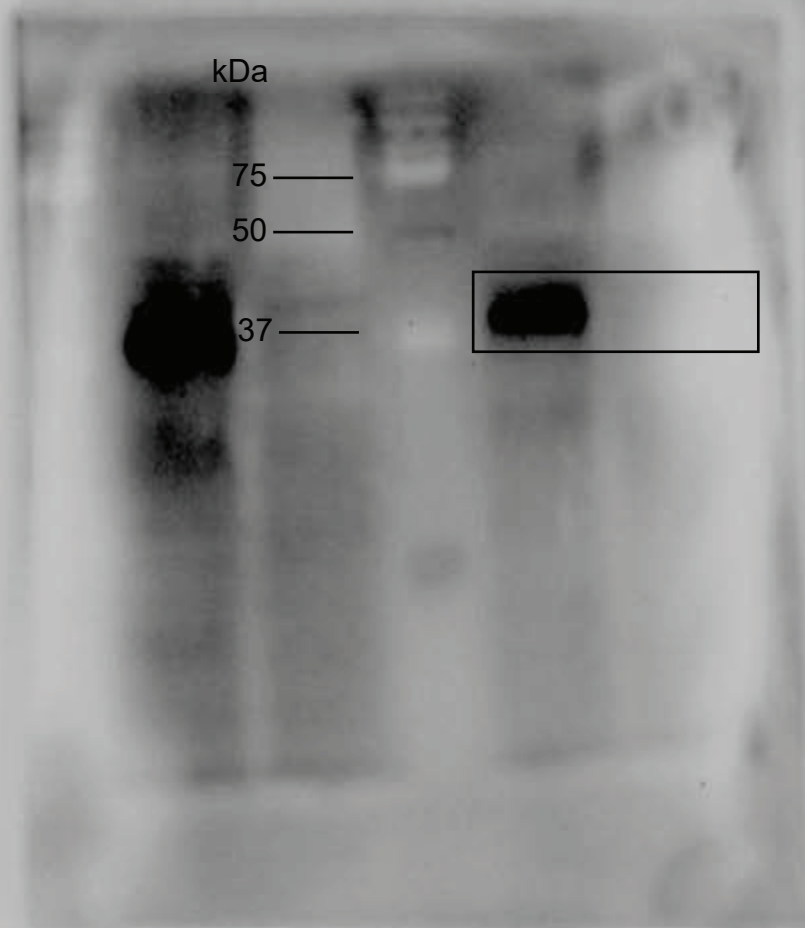

Figure 6D  
CDC20 Antibody  
(Cell Signaling Technology Cat# 4823, RRID:AB\_10549074)

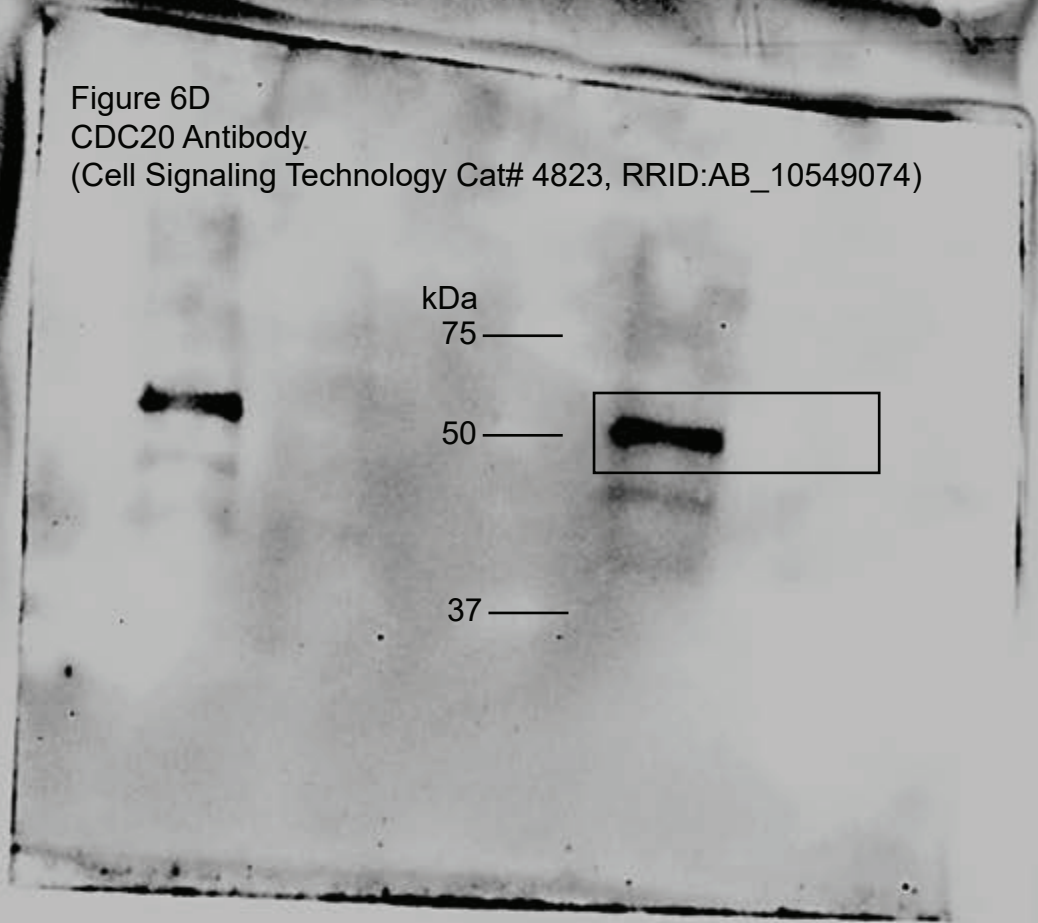

Figure 6D

GAPDH Antibody (G-9)

(Santa Cruz Biotechnology Cat# sc-365062, RRID:AB\_10847862)

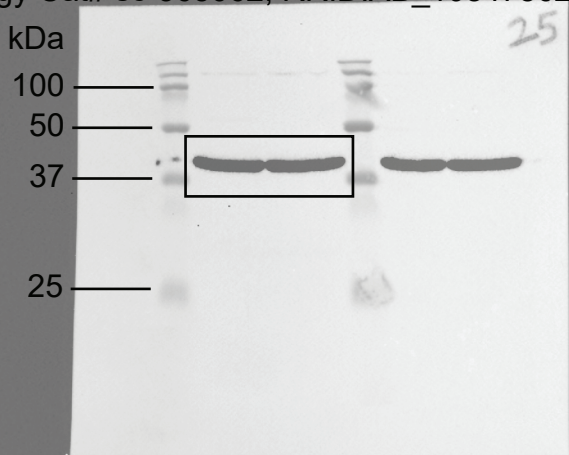

Figure S3A

Phospho-p44/42 MAPK (Erk1/2) (Thr202/Tyr204) (E10) Mouse mAb  
(Cell Signaling Technology Cat# 9106, RRID:AB\_331768)

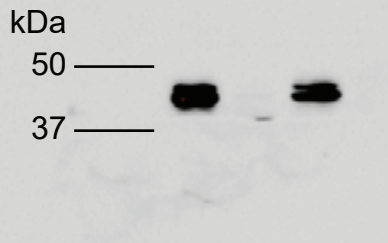

Figure S3A

p44/42 MAPK (Erk1/2) (137F5) Rabbit mAb

(Cell Signaling Technology Cat# 4695, RRID:AB\_390779)

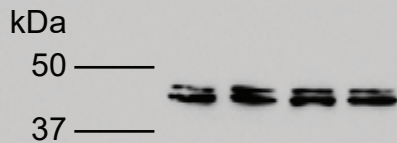

Figure S3A

Phospho-p90RSK (Ser380) (D3H11) Rabbit mAb

(Cell Signaling Technology Cat# 11989, RRID:AB\_2687613)

kDa

100 —  
75 —

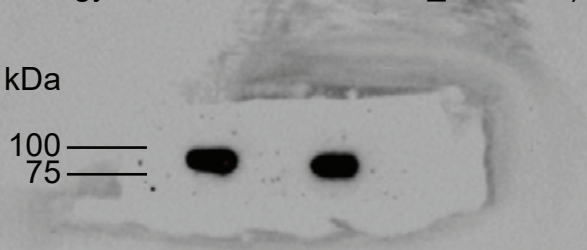

Figure S3A

RSK1 (D6D5) Rabbit mAb

(Cell Signaling Technology Cat# 8408, RRID:AB\_10828594)

kDa

100 —  
75 —

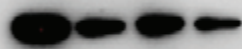

Figure S3A

Phospho-MEK1/2 (Ser217/221) (41G9) Rabbit mAb

(Cell Signaling Technology Cat# 9154, RRID:AB\_2138017)

kDa

50 ———

37 ———

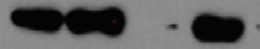

Figure S3A

MEK1/2 (D1A5) Rabbit mAb

(Cell Signaling Technology Cat# 8727, RRID:AB\_10829473)

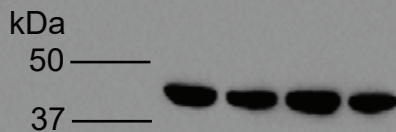

Figure S3A

GAPDH Antibody (G-9)

(Santa Cruz Biotechnology Cat# sc-365062, RRID:AB\_10847862)

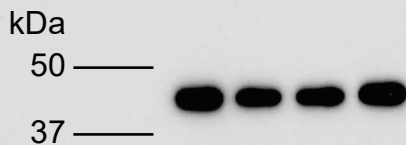

Figure S3B

Phospho-p44/42 MAPK (Erk1/2) (Thr202/Tyr204) (E10) Mouse mAb  
(Cell Signaling Technology Cat# 9106, RRID:AB\_331768)

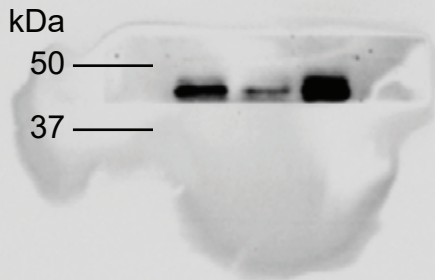

Figure S3B

p44/42 MAPK (Erk1/2) (137F5) Rabbit mAb

(Cell Signaling Technology Cat# 4695, RRID:AB\_390779)

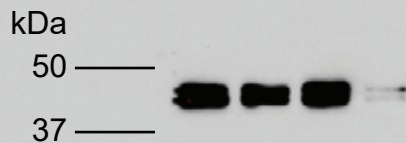

Figure S3B

Phospho-p90RSK (Ser380) (D3H11) Rabbit mAb

(Cell Signaling Technology Cat# 11989, RRID:AB\_2687613)

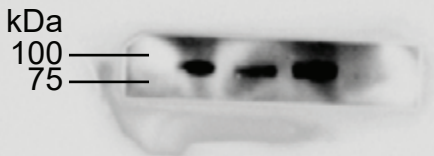

Figure S3B

RSK1 (D6D5) Rabbit mAb

(Cell Signaling Technology Cat# 8408, RRID:AB\_10828594)

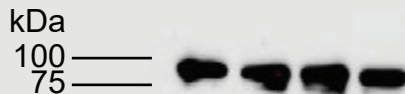

Figure S3B

Phospho-MEK1/2 (Ser217/221) (41G9) Rabbit mAb

(Cell Signaling Technology Cat# 9154, RRID:AB\_2138017)

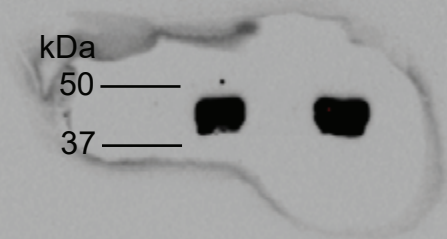

Figure S3B

MEK1/2 (D1A5) Rabbit mAb

(Cell Signaling Technology Cat# 8727, RRID:AB\_10829473)

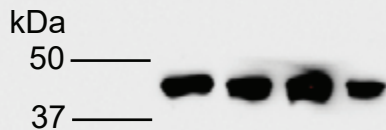

Figure S3B

GAPDH Antibody (G-9)

(Santa Cruz Biotechnology Cat# sc-365062, RRID:AB\_10847862)

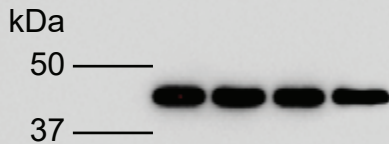

Figure S3C

Phospho-p44/42 MAPK (Erk1/2) (Thr202/Tyr204) (E10) Mouse mAb  
(Cell Signaling Technology Cat# 9106, RRID:AB\_331768)

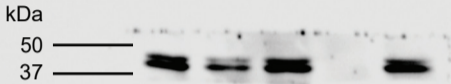

Figure S3C

p44/42 MAPK (Erk1/2) (137F5) Rabbit mAb

(Cell Signaling Technology Cat# 4695, RRID:AB\_390779)

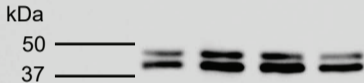

Figure S3C

Phospho-p90RSK (Ser380) (D3H11) Rabbit mAb

(Cell Signaling Technology Cat# 11989, RRID:AB\_2687613)

kDa  
100 —  
75 —

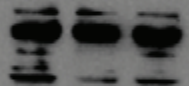

Figure S3C

RSK1 (D6D5) Rabbit mAb

(Cell Signaling Technology Cat# 8408, RRID:AB\_10828594)

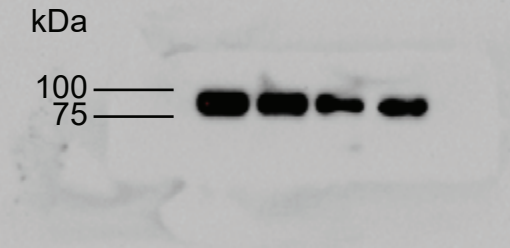

Figure S3C

Phospho-MEK1/2 (Ser217/221) (41G9) Rabbit mAb

(Cell Signaling Technology Cat# 9154, RRID:AB\_2138017)

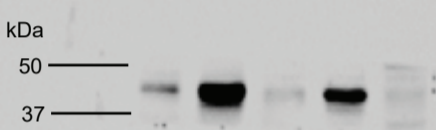

Figure S3C

MEK1/2 (D1A5) Rabbit mAb

(Cell Signaling Technology Cat# 8727, RRID:AB\_10829473)

kDa

50

37

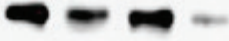

Figure S3C  
GAPDH Antibody (G-9)  
(Santa Cruz Biotechnology Cat# sc-365062, RRID:AB\_10847862)

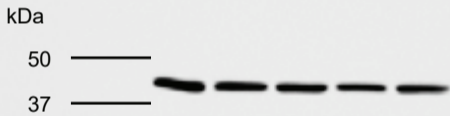

Figure S6C  
Rabbit anti-CDK1 Antibody  
(Thermo Fisher Scientific Cat# A303-663A, RRID:AB\_11205291)

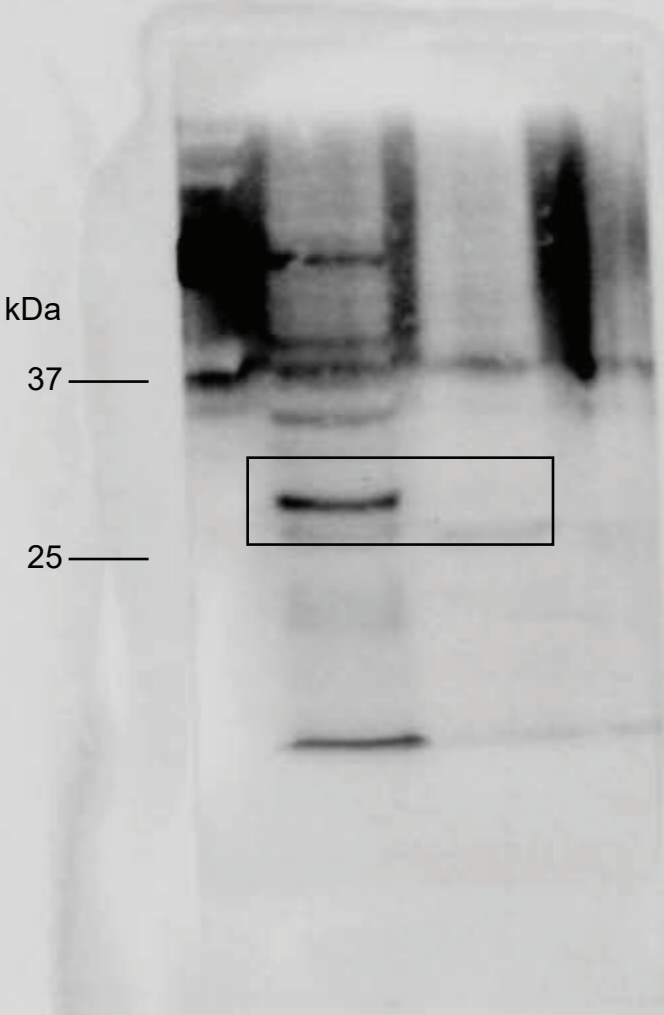

Figure S6C  
CCNB1/cyclin B1 Antibody (D-11)  
(Santa Cruz Biotechnology Cat# sc-7393, RRID:AB\_627336)

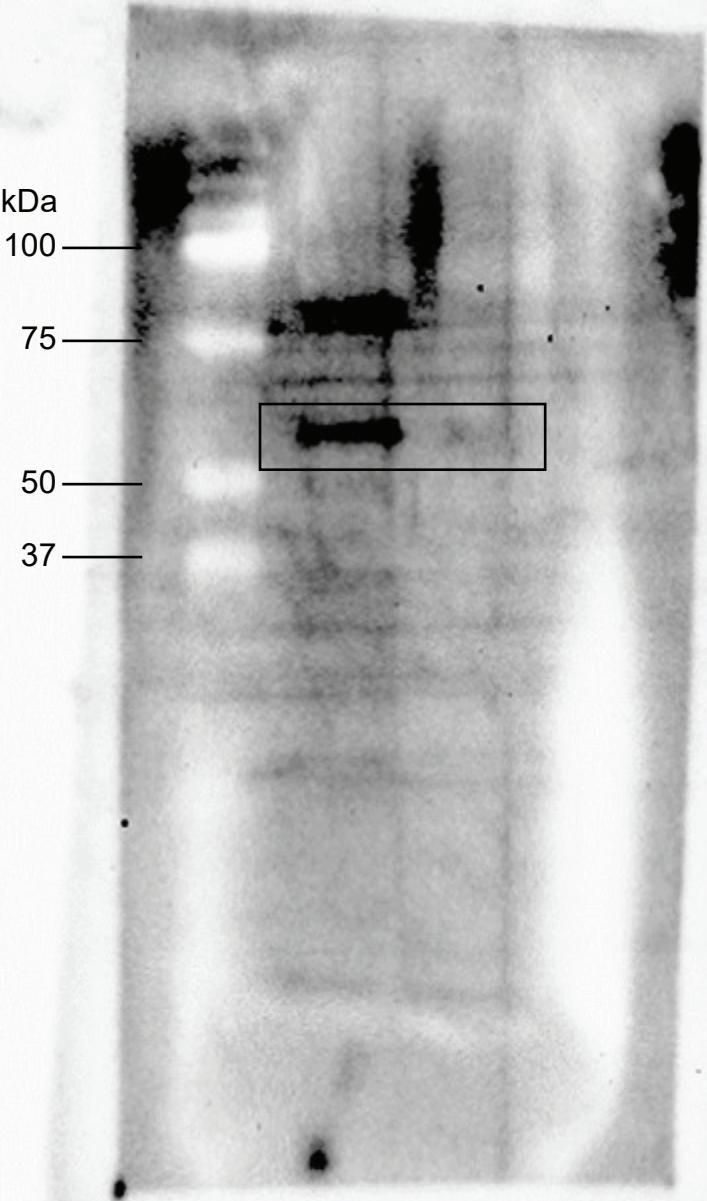

Figure S6C

cyclin D1 Antibody (A-12)

(Santa Cruz Biotechnology Cat# sc-8396, RRID:AB\_627344)

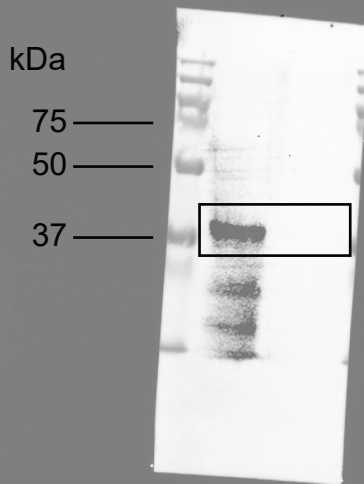

kDa  
75 —  
50 —  
37 —

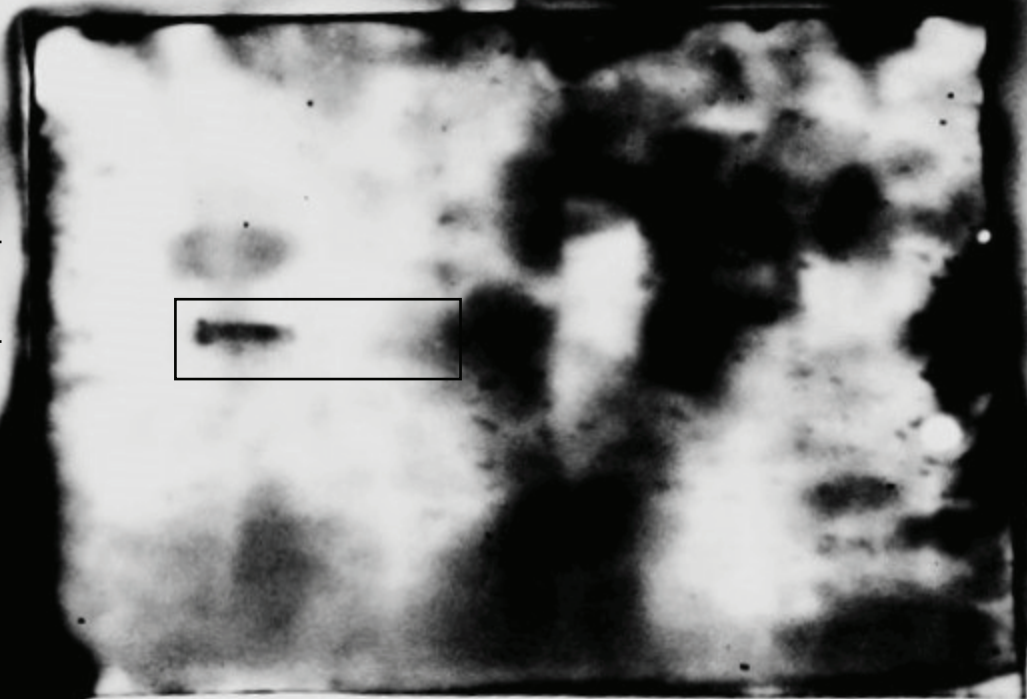

Figure S6C  
CDC20 Antibody  
(Cell Signaling Technology Cat# 4823, RRID:AB\_10549074)

Figure S6C  
GAPDH Antibody (G-9)  
(Santa Cruz Biotechnology Cat# sc-365062, RRID:AB\_10847862)

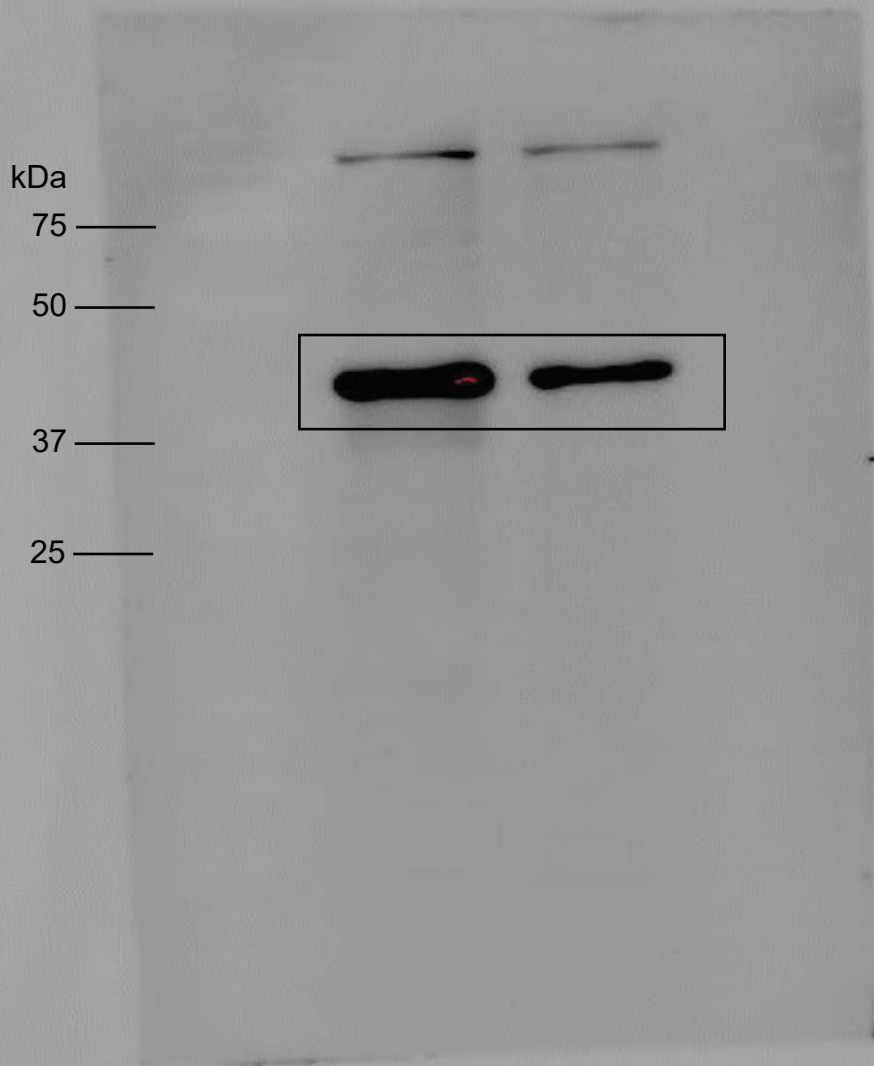

Supplement: sd2 [file 2]
